# Supplementary material for: Electron transport chain activity is a predictor and target for venetoclax sensitivity in multiple myeloma
Source: Nat Commun. 2020 Mar 6;11:1228. doi: 10.1038/s41467-020-15051-z (PMC7060223; doi:10.1038/s41467-020-15051-z)
Supplement: Supplementary file 1 — Supplementary Information [file 41467_2020_15051_MOESM1_ESM.pdf]

## **Supplementary Information**

**Electron transport chain activity is a predictor and target for venetoclax sensitivity in multiple myeloma**

Bajpai and Sharma et al.

**Supplementary Table 1: Characteristics of 50 myeloma patients tested for Ven +/- TTFA**

| Sample No. | Sample ID    | Disease | ISS | karyotype | FISH                                              | prior lines | Len ref | BZ ref | CZ ref | Pom ref | Dara ref | ASCT | Dex | Response to Venetoclax             | IC50 of Ven (μM) | IC50 of Ven TTFA (μM) |
|------------|--------------|---------|-----|-----------|---------------------------------------------------|-------------|---------|--------|--------|---------|----------|------|-----|------------------------------------|------------------|-----------------------|
| 1          | PS10001245-2 | MM      | ND  | ND        | t(11;14), +1q, -13                                | 2           | Y       | N      | N      | N       | N        | Y    | Y   | PR                                 | 0.04009          | 0.006375              |
| 2          | PS10001591   | MM      | 2   | complex   | +1q, +11                                          | 0           | N       | N      | N      | N       | N        | N    |     | CR                                 | 3.53E-09         | 3.01E-10              |
| 3          | PS10001620   | MM      | ND  | 46XY      | t(11;14), +9, -13, -17                            | 1           | N       | N      | N      | N       | N        | Y    | Y   | sCR on car/ven                     | 0.01673          | 0.000322              |
| 4          | PS10001750   | MM      | 3   | complex   | t(4;14), +1p, +1q, +3, +7, +9, +11, -13, del(17p) | 1           | Y       | N      | N      | N       | Y        | Y    |     |                                    | 0.001328         | 0.00007358            |
| 5          | PS10001677   | MM      | 3   | ND        | +1q, del(13q)                                     | 4           | Y       | Y      | Y      | Y       | Y        | N    |     |                                    | 0.3915           | 0.03543               |
| 6          | PS10001725   | PCL     | 1   | complex   | -1p, +1q, +3, -13, -14, -17                       | 5           | N       | N      | Y      | Y       | Y        | Y    |     |                                    | 0.1347           | 0.02717               |
| 7          | PS10001731   | MM      | 3   | ND        | ND                                                | 3           | Y       | N      | N      | Y       | Y        | Y    |     |                                    | 0.1525           | 0.03373               |
| 8          | PS10001638   | MM      | ND  | 46XY      | t(11;14)                                          | 1           | Y       | Y      | N      | N       | N        | N    |     |                                    | 0.3888           | 0.009763              |
| 9          | PS10001643   | MM      | ND  | 46XY      | t(11;14), +1p, +1q, +3, +7, +9, +13 del(17p)      | 6           | Y       | Y      | Y      | Y       | Y        | Y    | Y   | VGPR                               | 0.3194           | 0.00207               |
| 10         | PS10001651   | MM      | ND  | 46XX      | -1p, +1q, +3, +9, +11, -14q                       | 1           | Y       | N      | N      | N       | N        | Y    |     |                                    | 0.8008           | 2.06E-06              |
| 11         | PS10001633   | MM      | 2   | 46XX      | negative                                          | 0           | N       | N      | N      | N       | N        | N    |     |                                    | 0.1709           | 0.006803              |
| 12         | PS10001664   | MM      | 3   | 46XX      | +1q                                               | 2           | N       | N      | N      | N       | N        | Y    |     |                                    | 0.1391           | 0.02645               |
| 13         | PS10001194   | MM      | 1   | ND        | ND                                                | 4           | Y       | N      | N      | Y       | Y        | Y    |     |                                    | 0.115            | 0.001952              |
| 14         | PS10001695   | MM      | ND  | 46XY      | t(11;14)                                          | 3           | Y       | Y      | N      | N       | N        | N    |     |                                    | 1.512            | 0.01734               |
| 15         | PS10001551-2 | MM      | ND  | complex   | t(11;14), +1q, +9, -13, del(17p)                  | 2           | Y       | Y      | N      | N       | N        | N    |     | post treatment sample: Ven relapse | 0.955221         | 0.08115               |
| 16         | PS10001619   | MM      | 1   | complex   | +3, +7, +9, +11, +17                              | 1           | N       | N      | N      | N       | N        | N    |     |                                    | 0.57             | 0.08235               |
| 17         | PS10001658   | MM      | 2   | 46XX      | t(11;14), +1q, -13                                | 2           | Y       | N      | N      | Y       | N        | Y    | Y   | SD                                 | 0.4284           | 0.07859               |

|    |              |    |    |         |                                          |    |   |   |   |   |   |   |   |                       |          |          |
|----|--------------|----|----|---------|------------------------------------------|----|---|---|---|---|---|---|---|-----------------------|----------|----------|
| 18 | PS10001575   | MM | ND | complex | t(11;14), +1p, +9, del(13q), del(17p)    | 9  | Y | N | Y | Y | Y | Y |   | post treatment sample | 0.906646 | 0.07954  |
| 19 | PS10001683   | MM | 2  | complex | +3, +9, +11q                             | 1  | Y | N | N | N | N | N |   |                       | 0.9219   | 0.06378  |
| 20 | PS10001661-2 | MM | 2  | 46XY    | -1p, +11, -13, +14                       | 6  | Y | N | Y | Y | Y | Y |   |                       | 1.36     | 0.1391   |
| 21 | PS10001667   | MM | 3  | 46XY    | t(11;14), del(13q)                       | 1  | Y | N | N | N | N | Y | N | sCR                   | 0.1847   | 0.1426   |
| 22 | PS10001674   | MM | 1  | 46XX    | +1q, +9, +11q, del(13q)                  | 5  | Y | Y | Y | Y | Y | Y |   |                       | 0.609219 | 0.539597 |
| 23 | PS10001570   | MM | ND | 46XX    | t(11;14), +1, +3, +7, +9, +13, +17       | 3  | N | Y | N | N | N | Y | N | sCR                   | 0.5532   | 0.521725 |
| 24 | PS10001581   | MM | 1  | complex | +1, +3, +7, +9, +11                      | 4  | Y | Y | N | Y | Y | Y |   |                       | 2.875    | 1.669153 |
| 25 | PS10001556   | MM | ND | 46XX    | t(11;14)                                 | 3  | Y | Y | N | N | N | N |   |                       | 3.636    | 1.63     |
| 26 | PS10001406-2 | MM | ND | 46XX    | t(11;14), +1q, -13                       | 13 | Y | Y | Y | Y | Y | Y | Y | PR                    | 4.555868 | 1.449    |
| 27 | PS10001625   | MM | 1  | complex | -1p, +1q, +9, -13                        | 0  | N | N | N | N | N | N |   |                       | 4.084    | 1.661975 |
| 28 | PS10001618   | MM | 1  | 46XY    | +9, +11                                  | 0  | N | N | N | N | N | N |   |                       | 0.894877 | 0.757167 |
| 29 | PS10001646   | MM | 1  | complex | +7, +9, +11, -17                         | 0  | N | N | N | N | N | N |   |                       | 6.949    | 3.134469 |
| 30 | PS10001647   | MM | ND | 46XY    | +1q, +3, +7, +9, +14                     | 1  | N | N | N | N | N | Y |   |                       | 8.979264 | 0.7126   |
| 31 | PS10001650   | MM | 2  | 46XX    | t(11;14), +3, +7, +9, del(13q), del(17p) | 0  | N | N | N | N | N | N |   |                       | 1.540164 | 0.6821   |
| 32 | PS10001572   | MM | 2  | ND      | t(14;16)                                 | 0  | N | N | N | N | N | N |   |                       | 3.820009 | 1.197    |
| 33 | PS10001589   | MM | 3  | 46XX    | +1q, -4p, +11q, -13, +14q, del(17p), +17 | 4  | Y | N | Y | Y | Y | Y |   |                       | 5.658    | 3.243746 |
| 34 | PS10001395-2 | MM | 2  | complex | -1p, +9, +11q                            | 1  | N | N | N | N | N | Y |   |                       | 0.7444   | 0.747344 |
| 35 | PS10001666   | MM | 1  | 46XY    | +1q, -13, +IgH                           | 0  | N | N | N | N | N | N |   |                       | 5.847596 | 5.399    |
| 36 | PS10001636   | MM | 2  | 46XX    | +9, -13, +IgH                            | 5  | Y | Y | Y | Y | Y | Y |   |                       | 6.327    | 1.431    |
| 37 | PS10001686   | MM | ND | 46XX    | negative                                 | 2  | N | N | N | N | N | N |   |                       | 4.883    | 2.47     |

|    |              |     |    |         |                                               |   |   |   |   |   |   |   |  |                         |          |          |
|----|--------------|-----|----|---------|-----------------------------------------------|---|---|---|---|---|---|---|--|-------------------------|----------|----------|
| 38 | PS10001684   | MM  | 3  | complex | +3, +9, +11q                                  | 0 | N | N | N | N | N | N |  |                         | 0.6995   | 0.6854   |
| 39 | PS10001699   | MM  | 1  | ND      | +3, +7, +9, +11q                              | 0 | N | N | N | N | N | N |  |                         | 9.432763 | 6.956    |
| 40 | PS10001555   | PCL | 2  | 46XX    | t(11;14), +1, +3, del(13q), +17               | 9 | Y | Y | Y | Y | Y | Y |  | post treatment (1/2018) | 1.881508 | 1.530745 |
| 41 | PS10001702   | MM  | 3  | complex | t(4;14), +1q, -1p, +3, +7, +11q               | 0 | N | N | N | N | N | N |  |                         | 6.997025 | 1.12548  |
| 42 | PS10001690-2 | MM  | 1  | complex | -1p, +1q, del(13q), +14q, del(17p)            | 3 | Y | Y | Y | Y | Y | Y |  |                         | 0.681245 | 0.685949 |
| 43 | PS10001669   | MM  | ND | 46XX    | t(11;14), +1q, -13                            | 1 | N | N | N | N | N | Y |  |                         | 10.345   | 9.432763 |
| 44 | PS10001482   | MM  | 2  | ND      | t(11;14), +1q, -3                             | 7 | Y | N | N | Y | Y | Y |  |                         | 0.3608   | 0.278    |
| 45 | PS10001732   | ND  | ND | ND      | ND                                            | 0 | N | N | N | N | N | N |  |                         | 1.063    | 1.011    |
| 46 | PS10001565   | MM  | 2  | complex | vt(11;14), +1, +3, +7, +9, +17p               | 3 | Y | Y | N | Y | Y | Y |  |                         | 0.5404   | 2.343    |
| 47 | PS10001653   | MM  | 2  | complex | -1p, +3, +7, +9, +11, +IgH                    | 0 | N | N | N | N | N | N |  |                         | 0.6231   | 0.4943   |
| 48 | PS10001681   | MM  | 1  | ND      | +3, +7, +9, +11, +17                          | 0 | N | N | N | N | N | N |  |                         | 1.330198 | 0.2383   |
| 49 | PS10001622   | MM  | ND | 46XY    | +1q, +3, +7, +9, +11, -13, +14, del(17p), +17 | 4 | Y | Y | Y | Y | Y | Y |  |                         | 3.461    | 0.2092   |
| 50 | PS10001678   | MM  | 1  | ND      | -1p, -13, +IgH, -17                           | 0 | N | N | N | N | N | N |  |                         | 0.306    | 0.4797   |

**Supplementary Table 2: Characteristics of 9 myeloma patients tested for Ven +/- IACS**

| Sample No. | Sample ID  | Disease | ISS | karyotype | FISH                                         | prior lines | Len ref | BZ ref | Pom ref | Dara ref | ASCT | Dex | Response to Ven | IC50 of Ven (μM) | IC50 of Ven + IACS (μM) |
|------------|------------|---------|-----|-----------|----------------------------------------------|-------------|---------|--------|---------|----------|------|-----|-----------------|------------------|-------------------------|
| 1          | PS10001243 | MM      | 1   | normal    | +3, +7, +9, +11, +17                         | 2           | N       | Y      | N       | N        | N    | N   |                 | ND               | ND                      |
| 2          | PS10001818 | MM      | 3   | complex   | del(1p), +3, +7, +9, +11, del(13q), del(17p) | 0           | N       | N      | N       | N        | N    | N   |                 | 21.48            | 0.6104                  |
| 3          | PS10001835 | MM      | NA  | NA        | +1q, +3, -13, +14                            | 9           | Y       | N      | Y       | Y        | Y    | N   |                 | 5.833            | 2.587                   |
| 4          | PS10001822 | MM      | NA  | complex   | +1q, +3, +7, +9, +11, del(13q)               | 0           | N       | N      | N       | N        | N    | N   |                 | 3.318            | 0.3357                  |
| 5          | PS10001832 | MM      | 1   | NA        | t(11;14), +1q, -13, -16                      | 0           | N       | N      | N       | N        | N    | N   |                 | 2.018            | 0.01732                 |
| 6          | PS10001837 | MM      | NA  | normal    | +1q, +3, +7, +9, -13, -14, +17               | 1           | N       | N      | N       | N        | N    | N   |                 | 1.145            | 1.111                   |
| 7          | PS10001824 | MM      | 1   | normal    | +1, +3, +7, +9, +11, +13, +14, +17           | 0           | N       | N      | N       | N        | N    | N   |                 | 0.1553           | 0.1392                  |
| 8          | PS10001834 | MM      | 3   | NA        | +3, +9, +11, +17                             | 0           | N       | N      | N       | N        | N    | N   |                 | 0.03992          | 0.02831                 |
| 9          | PS10001582 | MM      | 3   | normal    | t(11;14), +1q                                | 3           | Y       | N      | Y       | Y        | Y    | Y   | CR              | 0.009957         | 0.000209                |

\* ND denotes IC50 values could not be determined.

**a**

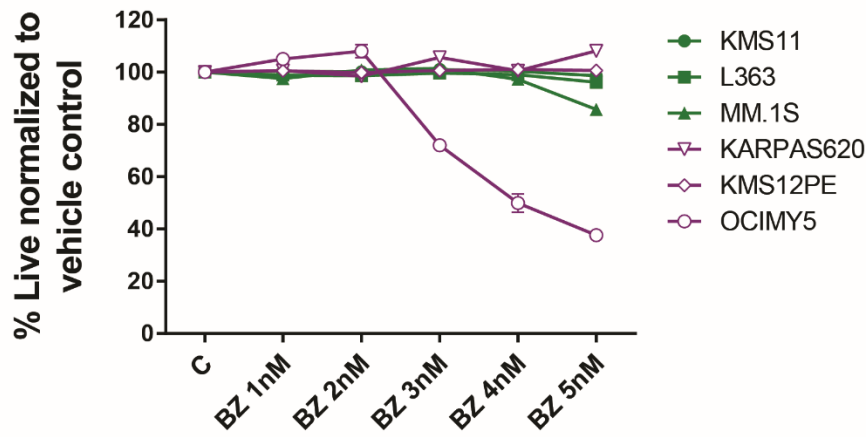

**b**

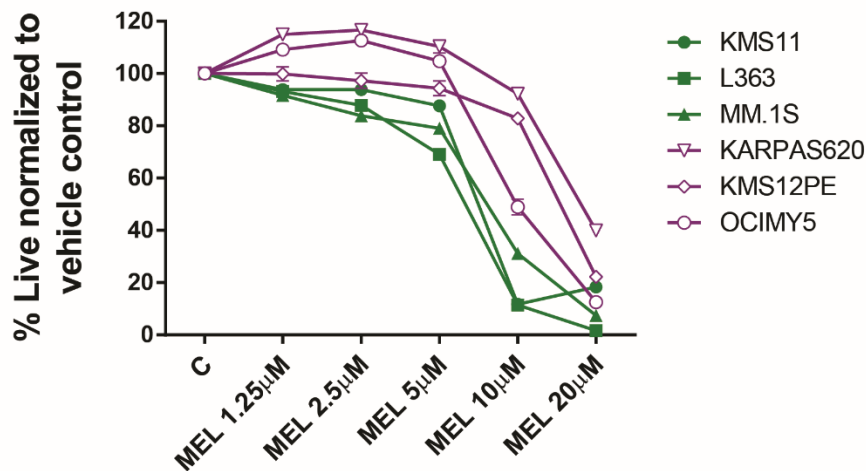

**Supplementary Figure 1: Pattern of venetoclax sensitivity detected in MM lines is not represented in sensitivity to bortezomib or melphalan:** Venetoclax resistant cell lines (KMS11, L363 and MM.1S) and venetoclax sensitive cell lines (KARPAS-620, KMS12PE and OCI-MY5) were cultured for 24 hrs in the presence of the indicated doses of (a) bortezomib (BZ: 1, 2, 3, 4 and 5nM) or (b) melphalan (MEL: 1.25, 2.5, 5, 10 and 20µM). Cell viability was measured by AnnexinV-DAPI staining and flow cytometry. n = 3 independent experiments. Data are presented as mean values +/- SEM. Source data are provided as a source data file.

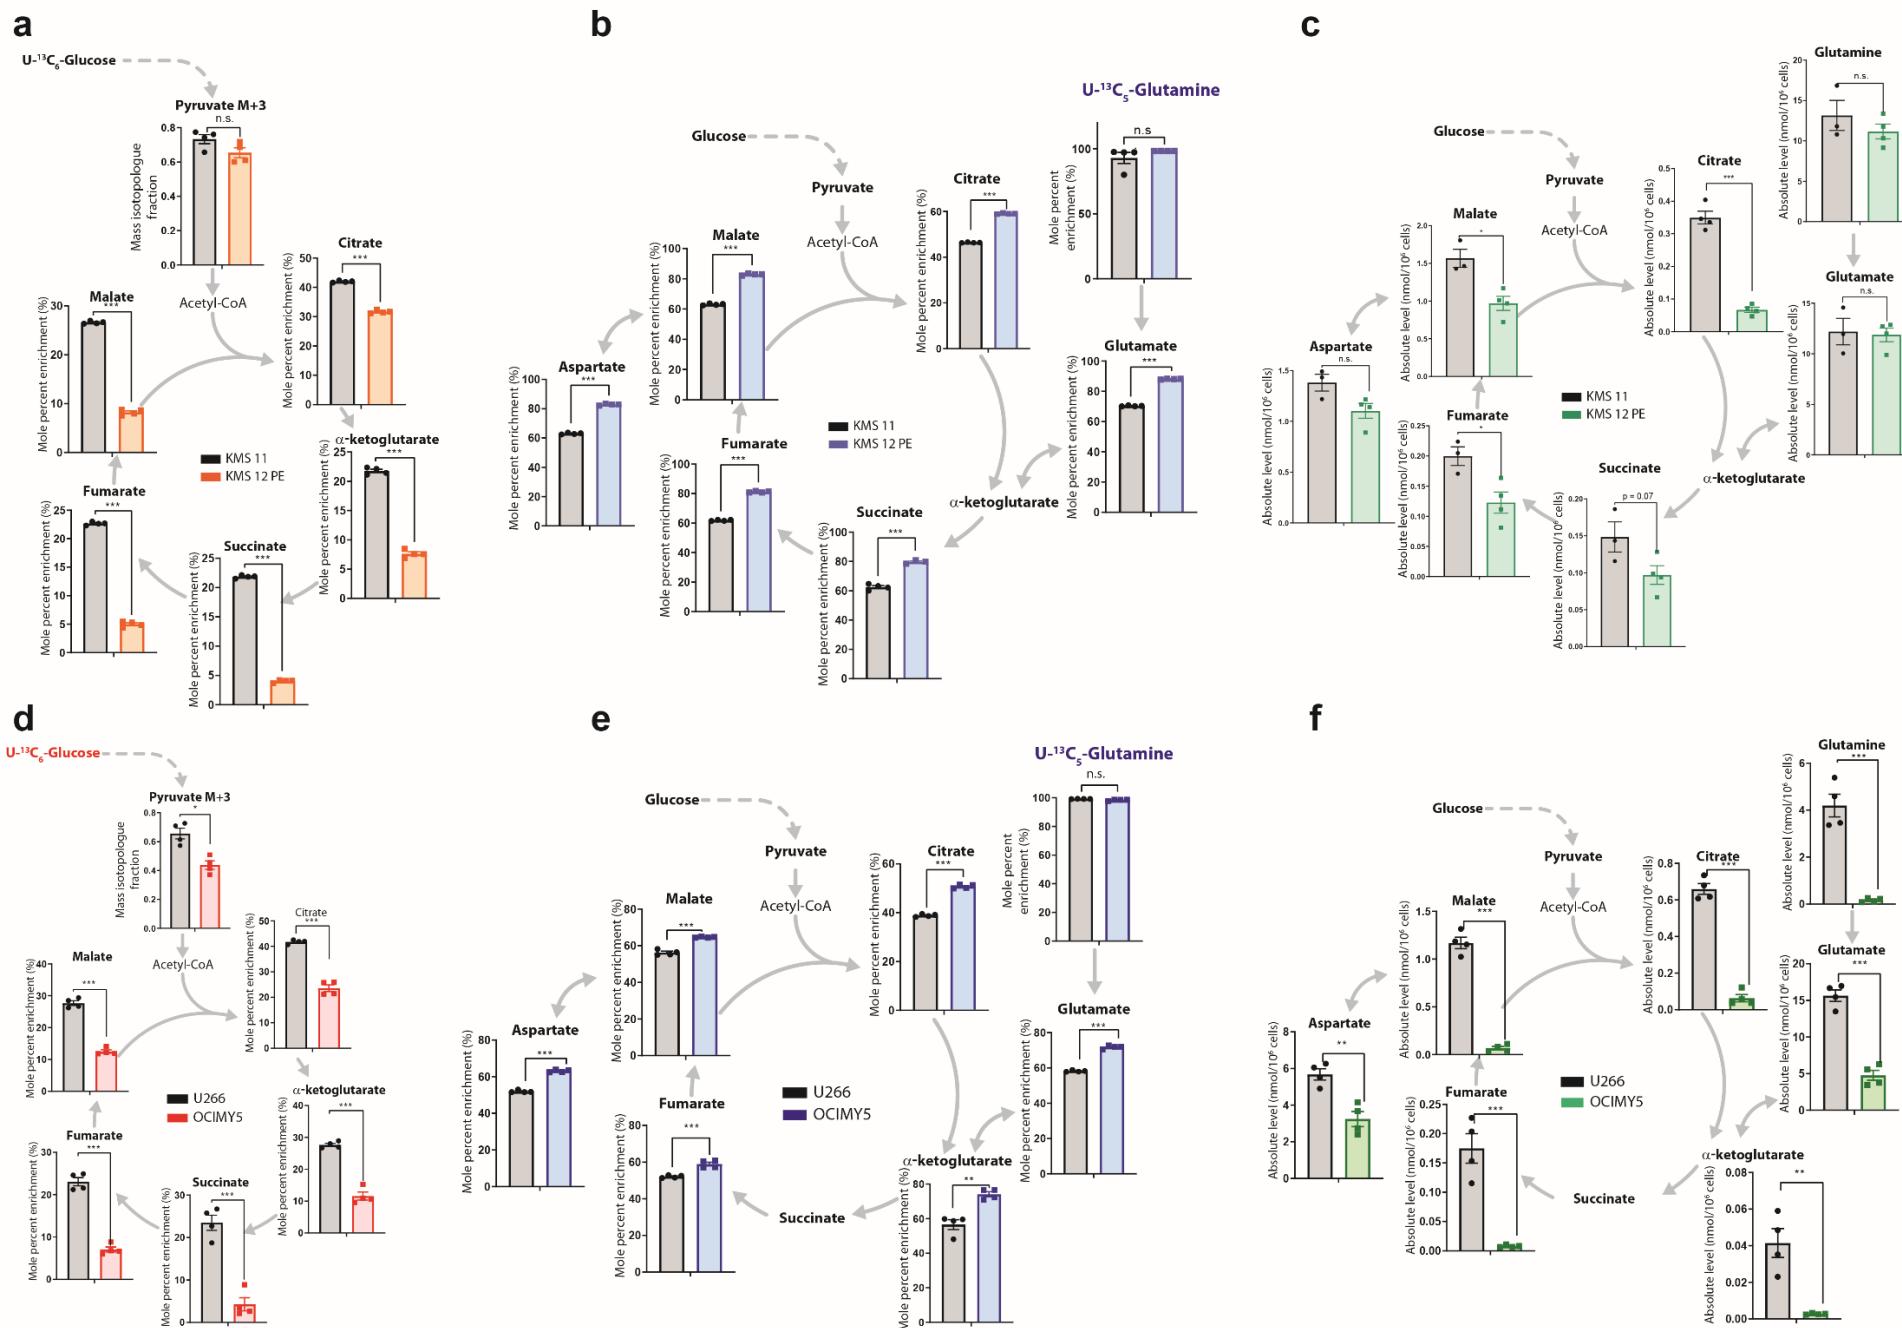

**Supplementary Figure 2: Venetoclax sensitive cell lines show lower glucose incorporation and total levels of TCA cycle intermediates.** Isotopologue labelling profiles and total levels of shown metabolites in **(a-c)** resistant non t(11;14) KMS11 and sensitive t(11;14) KMS12PE, and **(d-f)** resistant t(11;14) U266 and sensitive non t(11;14) OCIMY5 cells, supplemented with U-<sup>13</sup>C-glucose or U-<sup>13</sup>C-glutamine for 24 hrs. n = 4 independent experiments. Data are presented as mean values +/- SEM. p-values are calculated using two-tailed t-tests with Welch's correction. Source data are provided as a source data file.

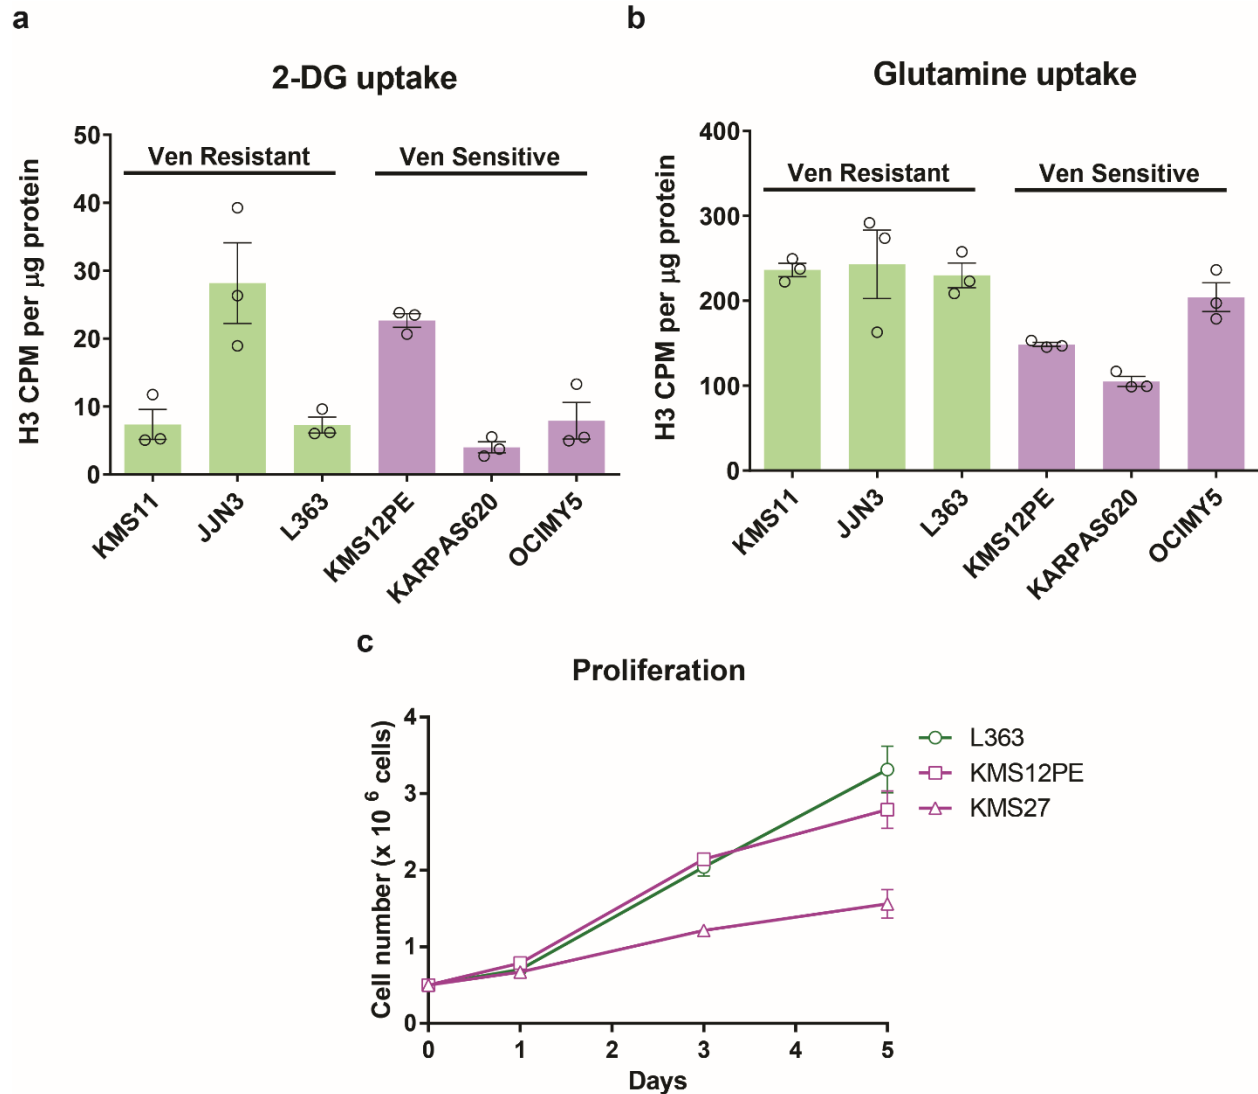

**Supplementary Figure 3: [3H]-2-deoxyglucose or [3H]-glutamine uptake and proliferation rates of MM lines do not correlate with sensitivity to venetoclax: (a-b)**  $1 \times 10^6$  cells each from venetoclax resistant cell lines (KMS11, JJN3 and L363) , shown in green, and venetoclax sensitive cell lines (KMS12PE, KARPAS-620 and OCI-MY5) , shown in purple, were plated in polyethylamine (PEE) (25µg per mL PEE and 0.15M NaCl in water) pre-coated 6-well plates and starved of either (a) glucose or (b) glutamine for 30min. 0.05mM cold 2-deoxyglucose and 0.05mM [3H]-2-deoxyglucose were added for 6min in (a), and 0.05mM cold glutamine and 0.05mM [3H]-glutamine were added for 15min in (b). Cells were washed, lysed and equal amounts of protein were evaluated by scintillation counting. n = 3 independent experiments. Data are presented as mean values  $\pm$  SEM. (c) L363, KMS12PE and KMS27 cell lines were cultured in media for 5 days. Cell counting was performed using BIORAD cell counter at 0, 1st, 2nd and 5th day. Source data are provided as a source data file. n = 3 independent experiments. Data are presented as mean values  $\pm$  SEM.

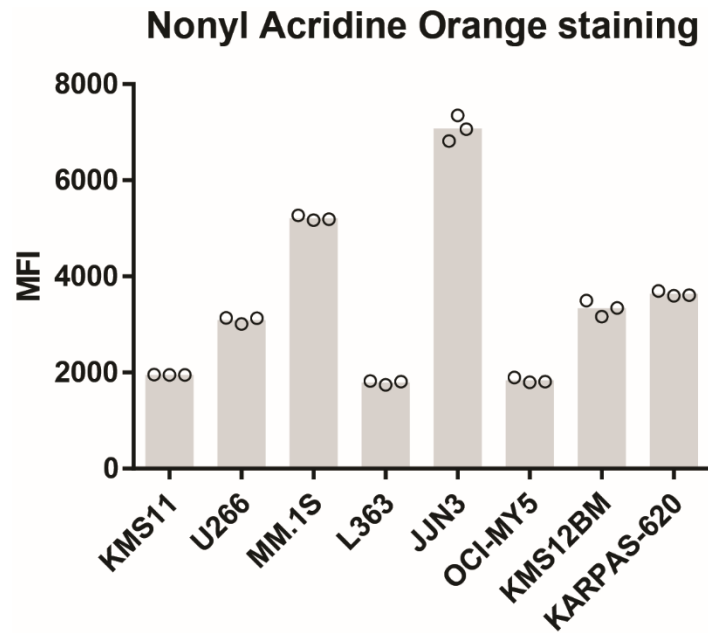

**Supplementary Figure 4: Mitochondrial mass does not differentiate venetoclax sensitive and resistant MM:** Venetoclax resistant cell lines (KMS11, U266, MM.1S, L363 and JJN3) and venetoclax sensitive cell lines (OCI-MY5, KMS12BM and KARPAS-620) were stained with nonyl acridine orange (NAO) dye for 30min. NAO binds to cardiolipin in the inner mitochondrial membrane regardless of the energetic state and can be used as an indirect correlate of mitochondrial content. Median fluorescence intensity (MFI) was measured by flow cytometry at an excitation of 495nm and emission of 519nm. n = 3 technical replicates. Source data are provided as a source data file.

## Succinate Ubiquinone Reductase Activity: KMS11

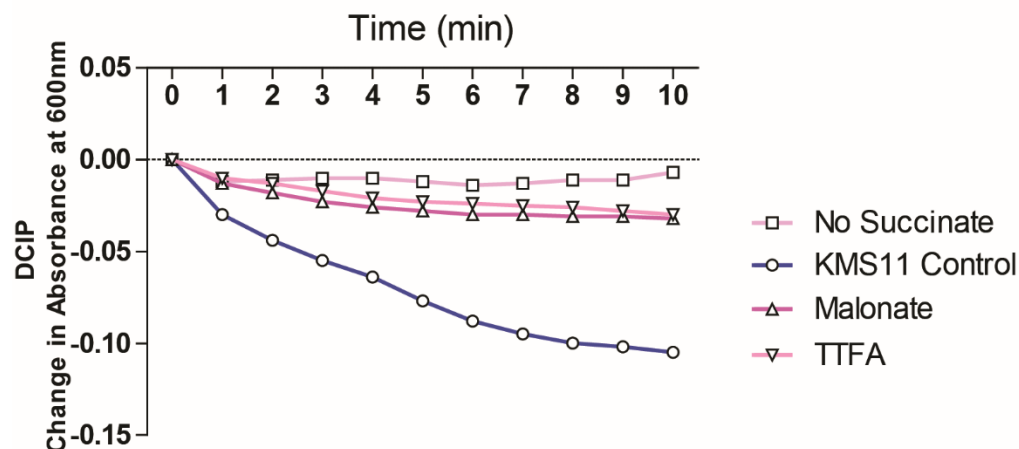

**Supplementary Figure 5: TTFA, malonate or lack of succinate inhibit succinate ubiquinone reductase activity in a SQR assay:** SQR activity was performed in KMS11 cells (n = 1 well per condition) as described in methods. Absence of succinate, or presence of TTFA or malonate do not change the absorbance of DCPIP (600nm) in contrast to the control cells, reflecting reduced SQR activity. Source data are provided as a source data file.

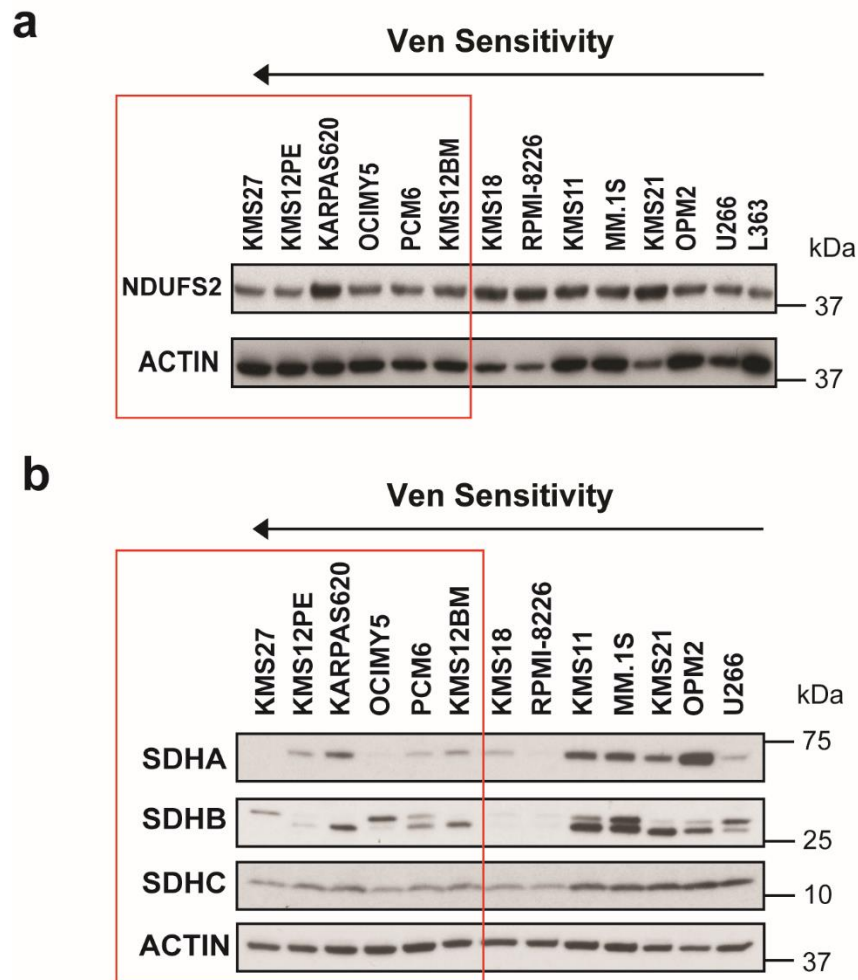

**Supplementary Figure 6: Complex I subunit NDUF52 and SDHA, B and C subunit expression levels do not correlate with Complex I or SDH/SQR activity respectively:** (a) Lysates from venetoclax resistant cells (KMS18, RPMI-8226, KMS11, MM.1S, KMS21BM, OPM2, U266 and L363) and venetoclax sensitive cell lines (KMS27, KMS12PE, KARPAS-620, OCI-MY5, PCM6 and KMS12BM) were prepared and expression of Complex I subunit NDUF52 and actin as a loading control were evaluated by western blotting. Representative blots from one of two independent experiments is presented. (b) Lysates from venetoclax resistant cells (KMS18, RPMI-8226, KMS11, MM.1S, KMS21BM, OPM2 and U266) and venetoclax sensitive cell lines (KMS27, KMS12PE, KARPAS-620, OCI-MY5, PCM6 and KMS12BM) were prepared and expression of the indicated SDH subunits and actin as a loading control were evaluated by western blotting. Source data are provided as a source data file.

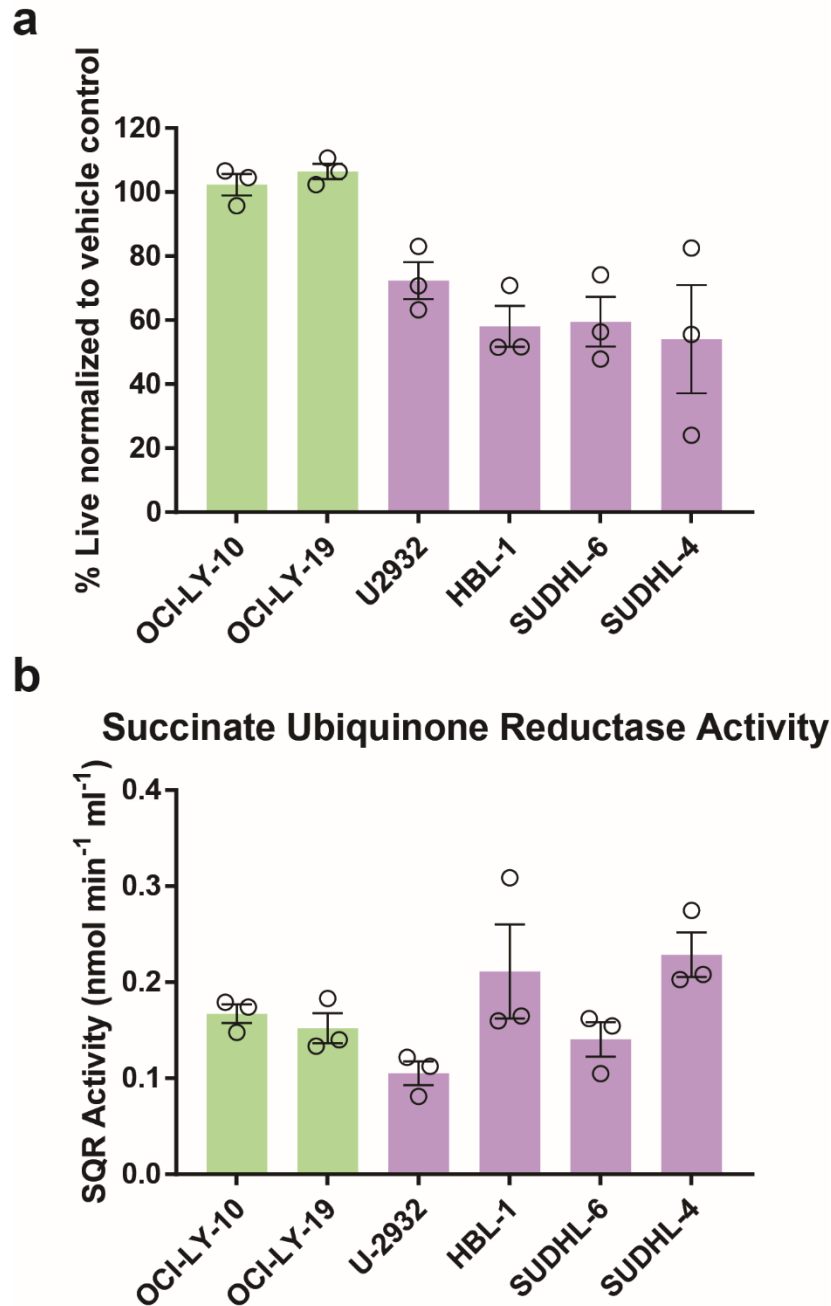

**Supplementary Figure 7: SQR activity of DLBCL lines does not correlate with venetoclax sensitivity:** (a) DLBCL cell lines treated with 0.5 $\mu$ M venetoclax for 24 hrs, were assessed for cell death by AnnexinV/DAPI flow cytometric staining. Percent live normalized to vehicle control with cell lines grouped by sensitivity (Venetoclax resistant lines in green and venetoclax sensitive lines in purple).  $n = 3$  independent experiments. Data are presented as mean values  $\pm$  SEM. (b) SQR activity was assessed in gently permeabilized whole cells supplemented with succinate and Complex I, III, and IV inhibitors.  $n = 3$  independent experiments. Data are presented as mean values  $\pm$  SEM. Source data are provided as a source data file.

**a**

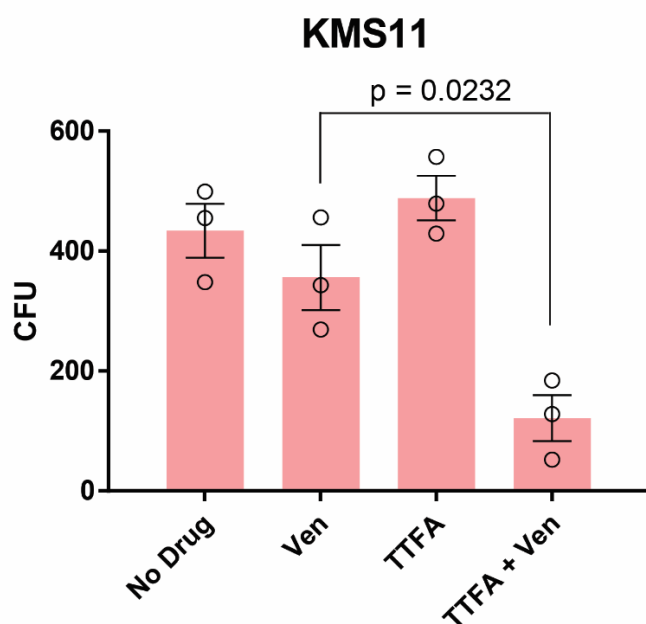

**b**

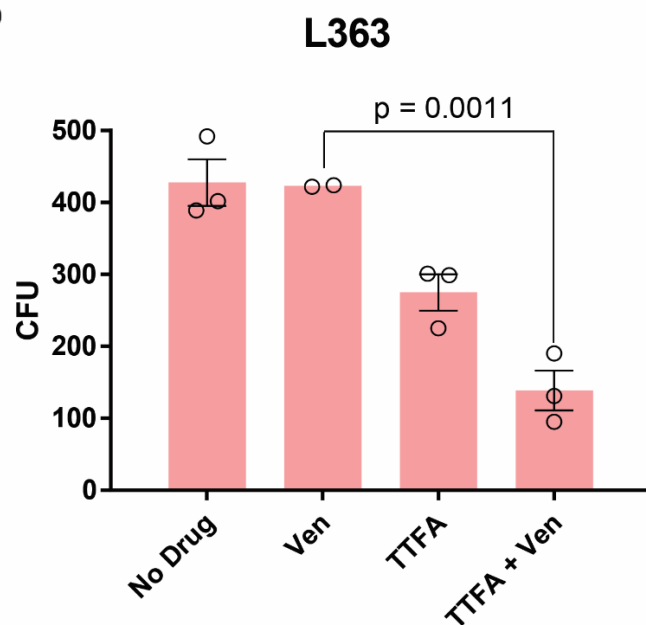

**Supplementary Figure 8: TTFA sensitizes L363 and KMS11 cells to venetoclax in a colony forming assay.** (a) KMS11 and (b) L363 were treated with venetoclax (0.1 $\mu$ M) and TTFA (100 $\mu$ M) or the combination in soft agar in a 96-well plate for 7 days and the number of colonies was assessed using NBT dye under Texas Red autofluorescence. n = 3 independent experiments. Data are presented as mean values  $\pm$  SEM. Adjusted p-values are calculated using a one-way ANOVA with post-hoc Tukey's multiple comparisons test. Source data are provided as a source data file.

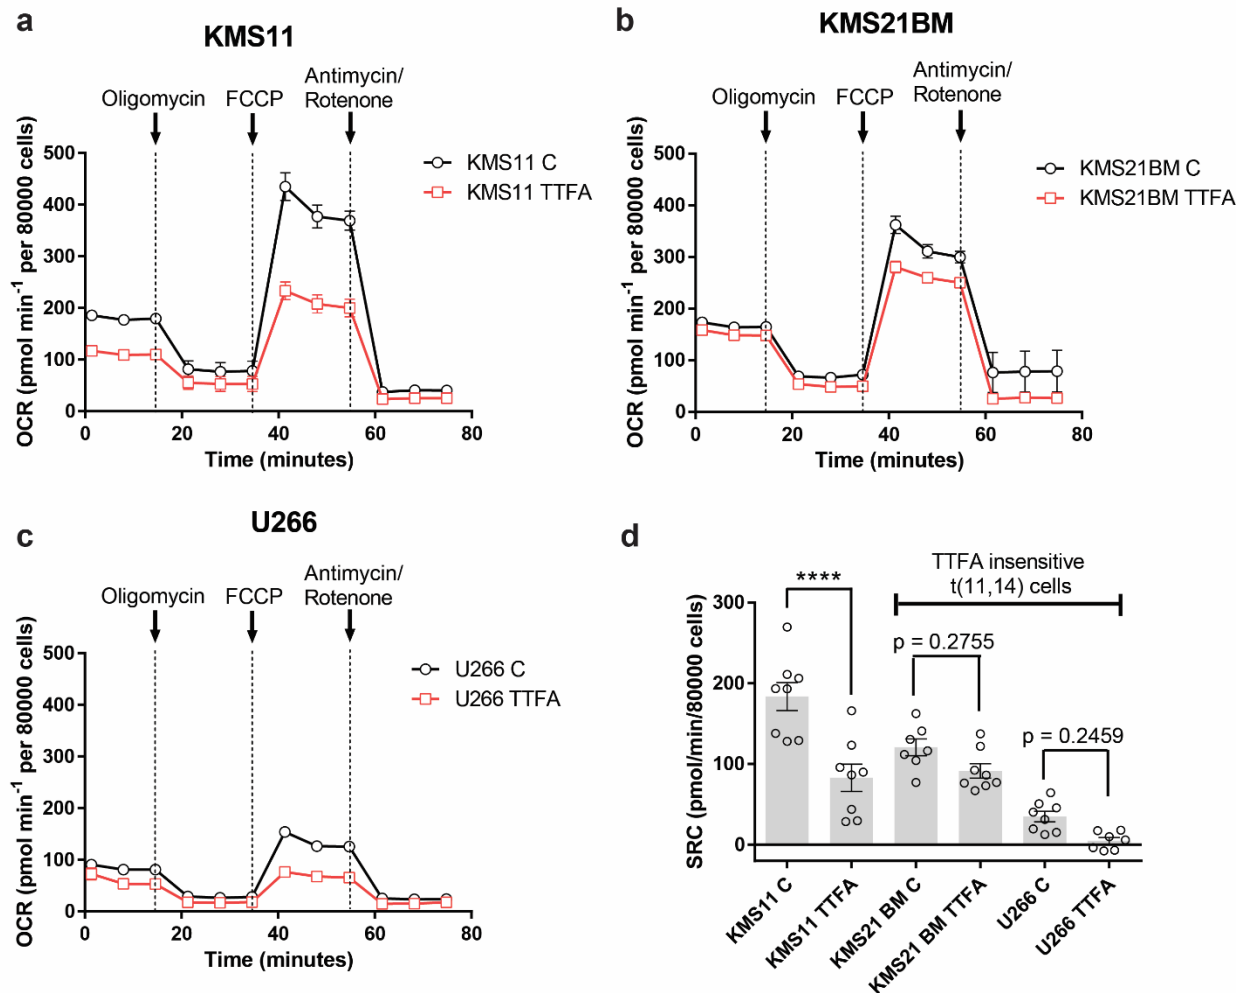

**Supplementary Figure 9: Investigation of OCR in TTFA + Ven resistant t(11;14) MM cells.** Oxygen consumption rate (OCR) in (a) KMS11, (b) KMS21BM, and (c) U266 determined after treating cells with or without 100μM TTFA for 24 hrs. n = 8 Seahorse wells except for KMS21BM C and U266 TTFA (n = 7). Data are presented as mean values +/- SEM. (d) Spare respiratory capacity (SRC) derived from (a-c) . Data are presented as mean values +/- SEM. Adjusted p-values are calculated using a two-way ANOVA with post-hoc Sidak's multiple comparisons test. Source data are provided as a source data file.

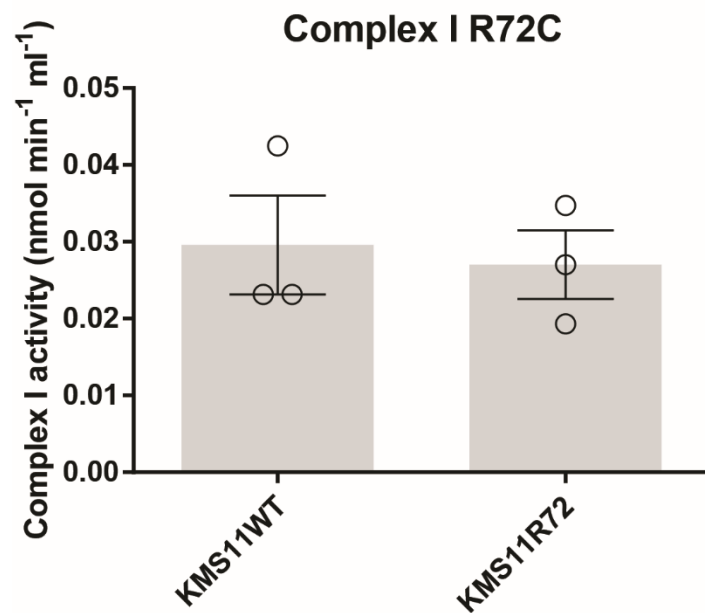

**Supplementary Figure 10: SDHC-R72C mutant-expressing KMS11 cells exhibit intact Complex I activity:** Complex I activity was assessed (as described in materials and methods) in KMS11 cells expressing the SDHC-R72C mutant or wild type SDHC.  $n = 3$  independent experiments. Data are presented as mean values  $\pm$  SEM. Source data are provided as a source data file.

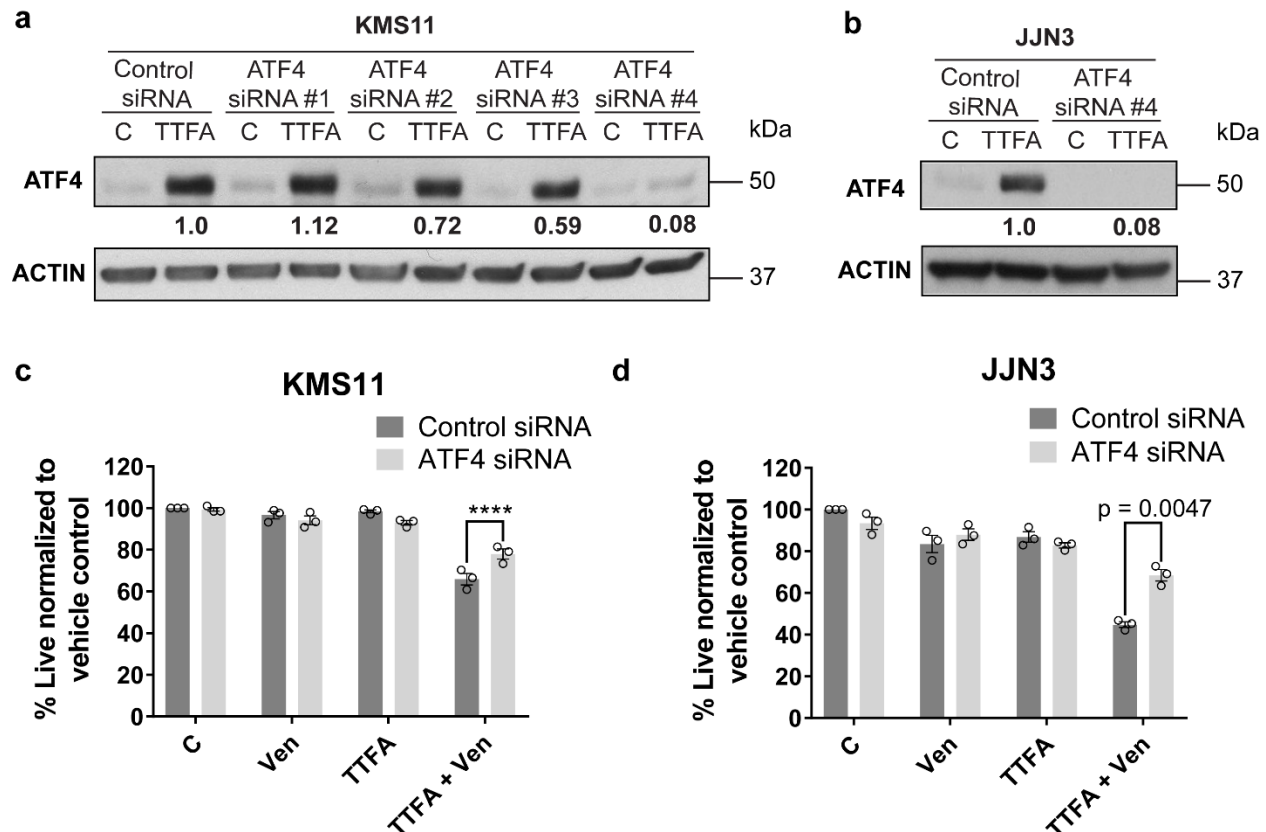

**Supplementary Figure 11: Knockdown of ATF4 in KMS11 and JJN3 cells using individual siRNA reverses sensitivity to venetoclax:** (a and b) KMS11 and JJN3 cells transfected with Control siRNA or ATF4 siRNA were treated with TTFA (100  $\mu$ M) for 24 hrs and evaluated for expression of the indicated proteins by immunoblot analysis. Representative blots from one of three independent experiments is presented. (c and d) Transfected cells were treated with venetoclax (0.5  $\mu$ M), TTFA (100  $\mu$ M) or the combination for 24 hrs and cell viability was assessed by AnnexinV/DAPI flow cytometric staining. n = 3 independent experiments. Data are presented as mean values  $\pm$  SEM. Adjusted p-values are calculated using a two-way ANOVA with post-hoc Tukey's multiple comparisons test. Source data are provided as a source data file.

a

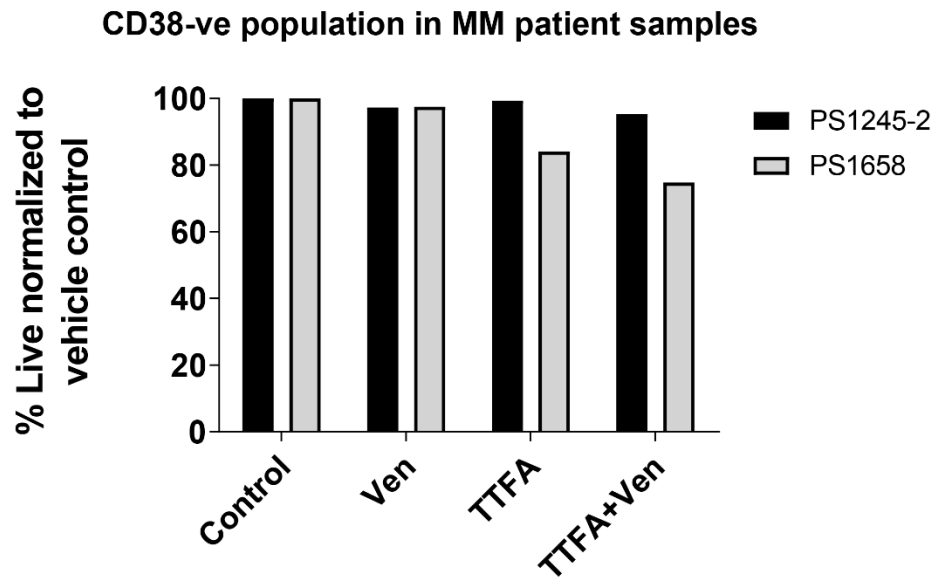

b

Myeloma cells : CD38+ve CD45-ve

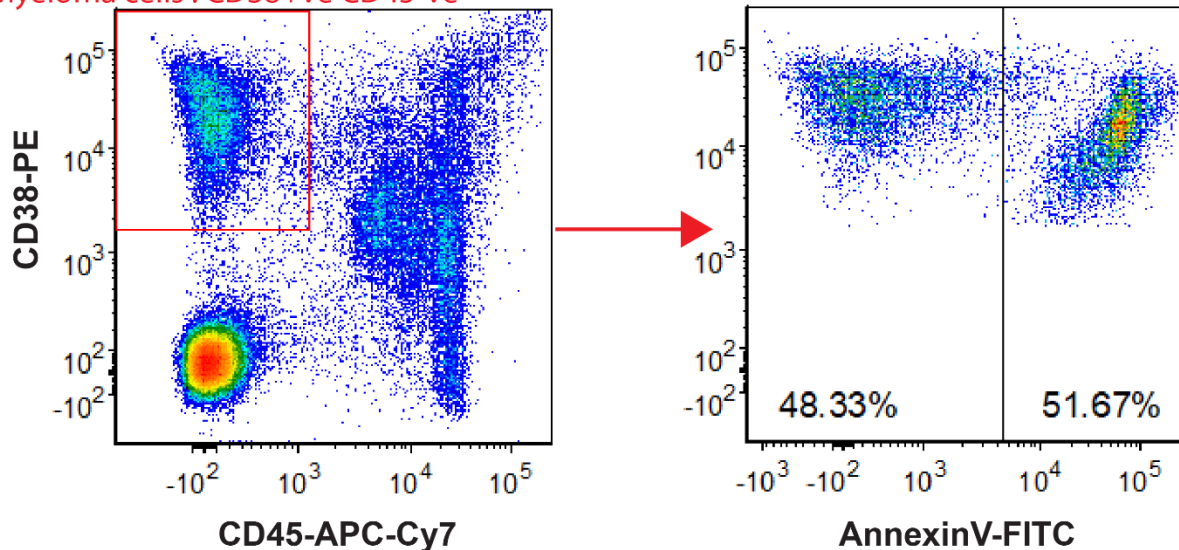

**Supplementary Figure 12: Venetoclax or TTFA do not impact the viability of non-myeloma normal cellular populations contained in patient bone marrow aspirates:** (a) Cells gated on CD38 -ve population were analyzed in PS10001245-2, a venetoclax sensitive patient sample bone marrow aspirate and PS10001658, a venetoclax resistant patient sample bone marrow aspirate. Aspirates were treated with venetoclax (0.1 $\mu$ M), TTFA (100 $\mu$ M) or the combination as indicated. Cell viability was assessed by AnnexinV staining using flow cytometry. Source data are provided as a source data file. (b) Gating strategy for analyzing patient samples: CD38-PE positive and CD45-APC-Cy7 negative cells were used to gate myeloma cells. Next, the gate was applied to the CD38-PE and Annexin-FITC flow plot to get percentage AnnexinV positive and negative myeloma cells.

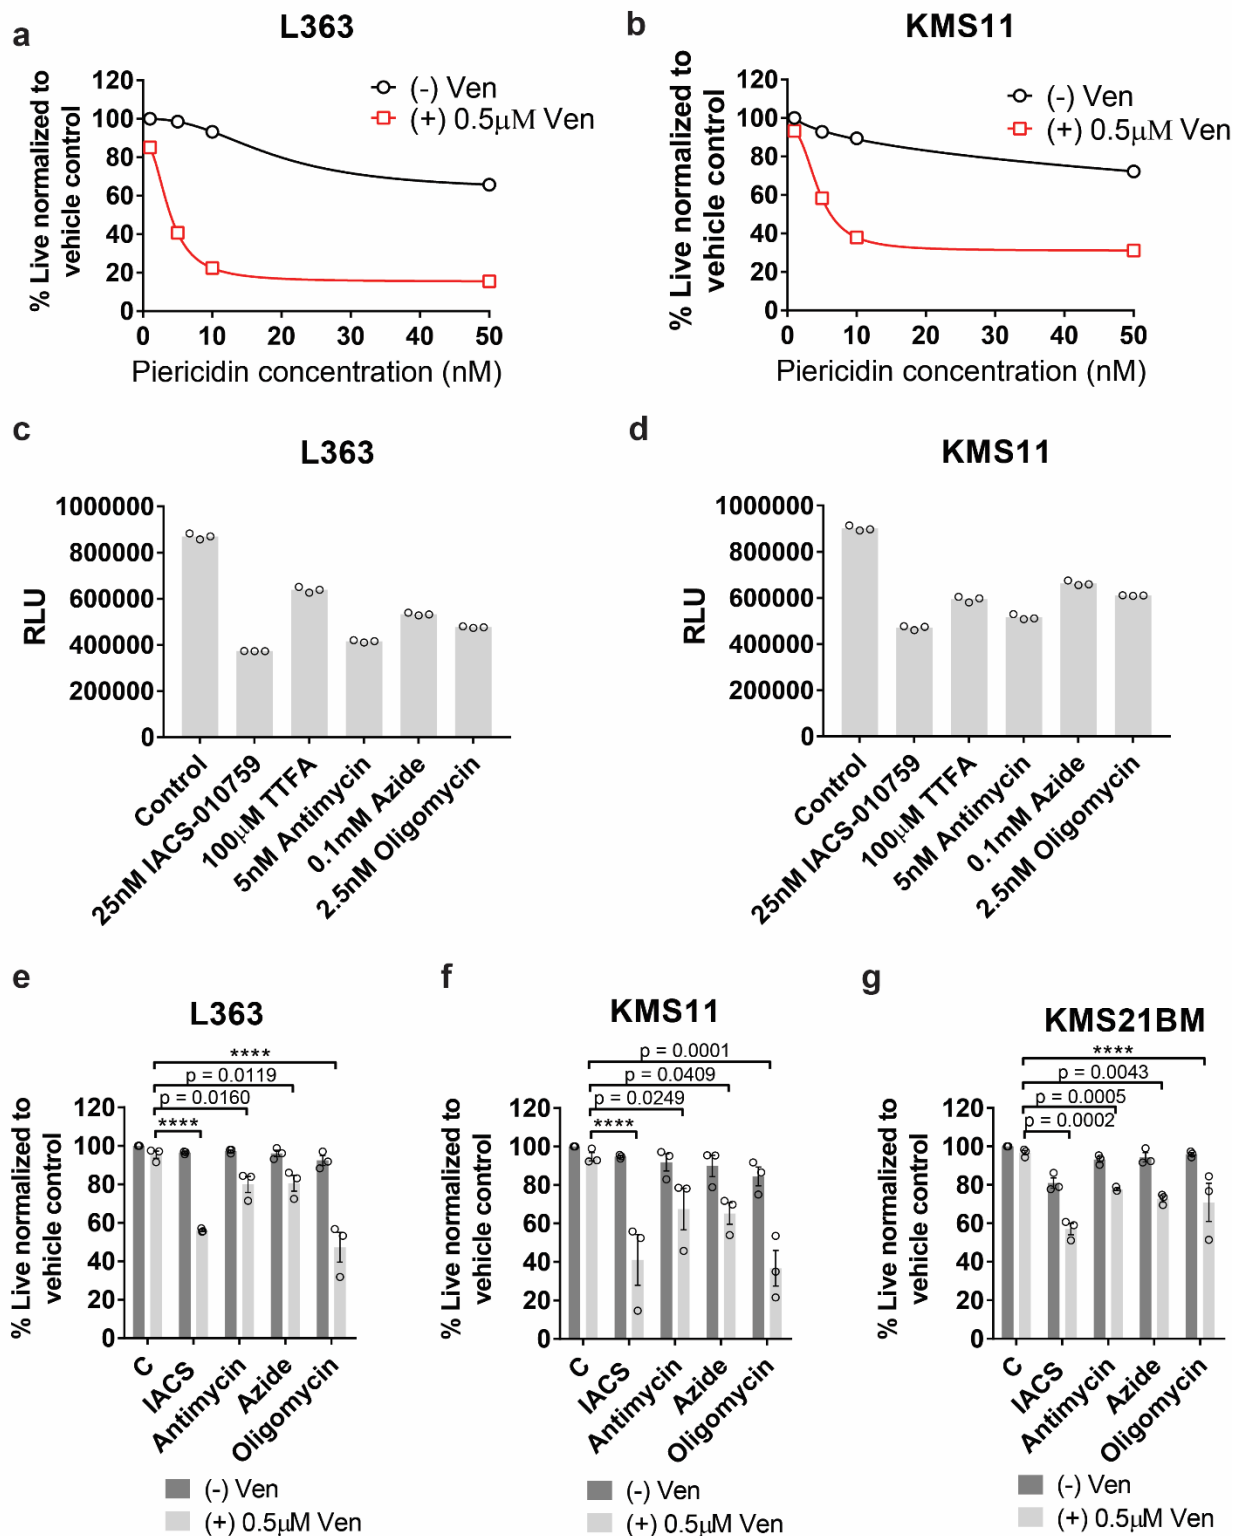

**Supplementary Figure 13: Inhibition of Complex III, Complex IV or Complex V uniformly sensitizes resistant MM to Venetoclax: (a-b)** Dose response curves for co-treatment of L363 and KMS11 with 0.5 $\mu$ M venetoclax and increasing doses of Complex I inhibitor piericidin for 24 hrs. Cell viability assessed by AnnexinV/DAPI staining. **(c-d)** Relative luminescence units indicative

of ATP levels in L363 and KMS11 on treatment with low doses of ETC inhibitors for 24 hrs. n = 3 technical replicates. **(e-g)** Complex I, Complex III, Complex IV or Complex V inhibition with IACS-010759 (25nM), antimycin (5nM), sodium azide (0.1mM) or oligomycin (2.5nM), respectively, sensitizes the indicated myeloma cell lines to 0.5 $\mu$ M of venetoclax on treatment for 24 hrs. Cell viability assessed by AnnexinV/DAPI staining. n = 3 independent experiments. Data are presented as mean values  $\pm$  SEM. Adjusted p-values are calculated using a two-way ANOVA with post-hoc Dunnett's multiple comparisons test. Source data are provided as a source data file.

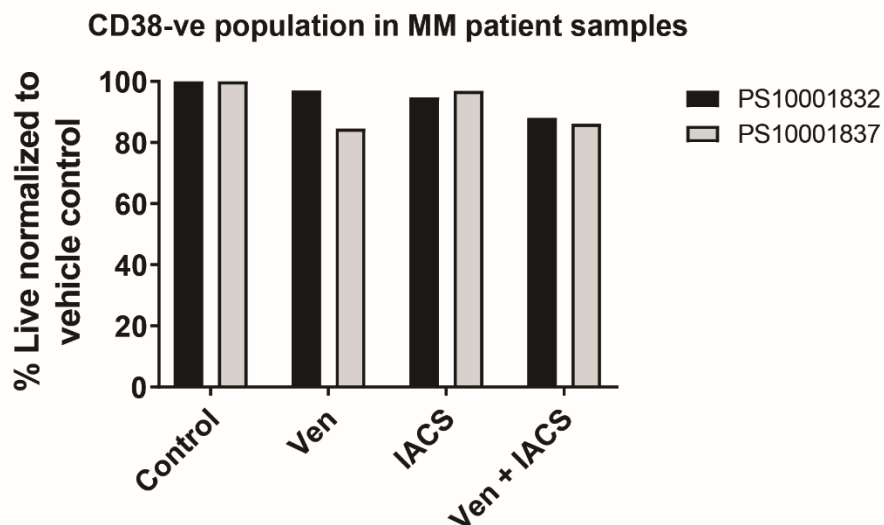

**Supplementary Figure 14: IACS-010759 in combination with venetoclax does not impact the viability of non-myeloma normal cellular populations contained in patient bone marrow aspirates:** Cells gated on CD38 -ve population were analyzed in PS10001832, and PS10001837. Aspirates were treated with the venetoclax (0.1 $\mu$ M) or IACS-010759 (25nM) or the combination as indicated. Cell viability was assessed by AnnexinV staining using flow cytometry. Source data are provided as a source data file.
